# Supplementary material for: Genetic Variation in Flowering Traits of Tasmanian Leptospermum scoparium and Association with Provenance Home Site Climatic Factors
Source: MDPI journal article supplement (doi:10.3390/plants11081029), 2022-04-10
Supplement: s1 [file s1]

## Supplementary Material

**Table S1.** Population locations and arithmetic means for traits

| Population | Latitude | Longitude | Survival | Precocity | Growth | PeakFlower2 | PeakFlower3 | MaxFlower2 | MaxFlower3 | DurFlower2 | DurFlower3 |
|------------|----------|-----------|----------|-----------|--------|-------------|-------------|------------|------------|------------|------------|
| ac         | -41.5349 | 146.4300  | 0.6      | 797.47    | 114.13 | 80.53       | 80.07       | 4.60       | 5.06       | 13.93      | 27.28      |
| as         | -42.1268 | 145.8892  |          |           |        | 82.97       | 79.22       | 4.40       | 6.09       | 17.70      | 32.11      |
| ca         | -41.0031 | 147.8040  | 0.72     | 761.89    | 134.00 | 114.55      | 106.53      | 5.13       | 3.70       | 20.25      | 18.25      |
| cr         | -42.3790 | 146.6077  | 0.52     | 819.23    | 117.62 | 96.53       | 87.64       | 5.00       | 4.96       | 21.06      | 27.10      |
| cr2        | -41.4462 | 146.2387  | 0.88     | 586.55    | 154.86 | 90.03       | 81.55       | 6.44       | 4.96       | 19.68      | 29.98      |
| cs         | -41.7167 | 145.0764  | 0        |           |        |             |             |            |            |            |            |
| el         | -42.5873 | 146.6919  | 0.64     | 721.56    | 126.81 | 100.58      | 89.18       | 5.14       | 4.96       | 18.38      | 26.90      |
| en         | -43.0316 | 147.9033  | 0.64     | 599.13    | 130.93 | 102.53      | 94.36       | 6.00       | 4.52       | 20.95      | 25.00      |
| er         | -42.6503 | 146.4684  | 0.36     | 865.00    | 100.00 | 87.21       | 79.24       | 4.55       | 5.30       | 15.64      | 32.15      |
| flo        | -42.7639 | 146.6162  | 0.76     | 758.05    | 122.42 | 80.99       | 77.86       | 5.65       | 5.16       | 15.13      | 32.24      |
| fp         | -42.8135 | 146.3855  | 0.56     | 822.00    | 119.43 | 92.93       | 83.29       | 5.16       | 5.09       | 17.53      | 31.20      |
| gf         | -41.5049 | 146.3431  | 0.72     | 573.00    | 145.94 | 96.01       | 90.20       | 5.46       | 4.67       | 17.10      | 20.54      |
| gm         | -42.0662 | 145.5958  | 0.24     | 816.67    | 115.17 | 85.18       | 79.44       | 4.83       | 5.36       | 18.00      | 33.07      |
| go         | -41.2700 | 148.1544  | 0.8      | 524.25    | 128.15 | 112.43      | 104.04      | 6.08       | 4.00       | 22.17      | 17.63      |
| gv         | -43.1637 | 146.8591  | 0.64     | 739.94    | 150.13 | 85.82       | 79.06       | 4.68       | 4.43       | 17.21      | 29.65      |
| hd         | -42.0643 | 145.2715  | 0.72     | 782.83    | 132.65 | 98.43       | 92.66       | 4.71       | 4.70       | 22.58      | 26.33      |
| ju         | -42.7457 | 146.6140  | 0.64     | 810.94    | 128.60 | 83.37       | 76.95       | 4.83       | 5.29       | 14.35      | 32.28      |
| kl         | -42.8804 | 147.2921  | 0.72     | 522.28    | 144.61 | 111.21      | 96.36       | 5.87       | 4.79       | 19.36      | 20.63      |
| lg         | -42.9719 | 147.1818  | 0.56     | 708.14    | 142.57 | 99.67       | 86.18       | 5.14       | 4.58       | 19.18      | 29.10      |
| ll         | -42.0226 | 147.7494  | 0.52     | 697.62    | 100.92 | 108.10      | 92.86       | 5.67       | 4.26       | 16.22      | 22.02      |
| lm         | -43.2120 | 147.0527  | 0.44     | 814.82    | 138.09 | 95.91       | 84.67       | 5.52       | 4.50       | 19.47      | 24.56      |
| lp2        | -42.7667 | 146.0524  | 0.76     | 852.00    | 130.63 | 88.17       | 81.56       | 4.63       | 5.26       | 15.32      | 29.24      |
| md         | -41.9338 | 145.4401  | 0.44     | 882.18    | 157.82 | 83.02       | 81.40       | 3.30       | 5.53       | 13.45      | 35.24      |
| mf         | -41.9910 | 147.8574  | 0.28     | 795.86    | 115.29 | 73.97       | 69.67       | 5.79       | 3.96       | 17.57      | 28.74      |
| mf2        | -43.1961 | 147.3967  | 0.68     | 637.24    | 153.50 | 94.51       | 83.46       | 5.79       | 4.13       | 20.43      | 28.33      |
| mg         | -43.0542 | 147.2339  | 0.52     | 595.92    | 151.08 | 106.45      | 91.79       | 6.00       | 4.62       | 17.92      | 27.67      |

|            |          |          |      |         |        |        |        |      |      |       |       |
|------------|----------|----------|------|---------|--------|--------|--------|------|------|-------|-------|
| <b>mn</b>  | -42.9180 | 147.3152 | 0.72 | 587.22  | 123.56 | 109.84 | 96.13  | 6.18 | 4.88 | 27.40 | 25.96 |
| <b>mo</b>  | -41.1824 | 147.8758 | 0.76 | 651.53  | 116.44 | 105.28 | 92.60  | 5.83 | 4.30 | 18.26 | 20.11 |
| <b>nc</b>  | -42.9837 | 147.5365 | 0.72 | 628.61  | 105.22 | 109.90 | 97.40  | 5.38 | 4.57 | 20.61 | 21.46 |
| <b>oc</b>  | -41.8903 | 148.0472 | 0.72 | 527.83  | 126.06 | 110.98 | 98.65  | 5.75 | 4.43 | 17.33 | 19.28 |
| <b>pb</b>  | -40.8417 | 145.3148 | 0.68 | 716.18  | 124.12 | 60.62  | 49.50  | 5.96 | 4.88 | 27.17 | 27.62 |
| <b>pr</b>  | -43.1527 | 147.2280 | 0.52 | 722.38  | 163.46 | 86.57  | 81.87  | 5.30 | 4.91 | 17.53 | 26.36 |
| <b>sec</b> | -43.6075 | 146.8391 | 0.6  | 725.13  | 103.27 | 84.58  | 77.43  | 4.47 | 4.32 | 18.58 | 31.50 |
| <b>sr</b>  | -42.8610 | 146.1992 | 0.84 | 815.90  | 142.10 | 109.43 | 100.24 | 5.10 | 5.70 | 22.63 | 24.77 |
| <b>wa</b>  | -42.3806 | 146.5078 | 0.56 | 813.29  | 129.14 | 92.33  | 84.53  | 5.45 | 5.17 | 17.29 | 29.19 |
| <b>wd</b>  | -42.8227 | 146.2778 | 0.4  | 1049.20 | 91.00  | 82.60  | 79.07  | 4.00 | 5.32 | 15.13 | 33.47 |
| <b>wm</b>  | -41.4771 | 146.1090 | 0.72 | 729.83  | 136.56 | 84.91  | 80.02  | 5.05 | 5.32 | 17.83 | 33.41 |
| <b>wp</b>  | -40.9419 | 144.6682 | 0.8  | 668.25  | 99.84  | 68.56  | 60.63  | 6.04 | 4.71 | 30.44 | 34.75 |
| <b>wt</b>  | -41.4688 | 145.4266 | 0.76 | 720.47  | 129.11 | 83.62  | 79.03  | 4.52 | 5.57 | 16.96 | 31.33 |
| <b>ww</b>  | -42.6855 | 146.7779 | 0.6  | 653.93  | 135.47 | 107.40 | 94.94  | 5.73 | 4.36 | 20.92 | 19.18 |

**Table S2.** 35 BIOCLIM climatic parameters from ANUCLIM version 6.1 software (Xu and Hutchinson 2010).

| Code | BIOCLIM Variable                         |
|------|------------------------------------------|
| 1    | Annual Mean Temperature                  |
| 2    | Mean Diurnal Range(Mean(period max-min)) |
| 3    | Isothermality 2/7                        |
| 4    | Temperature Seasonality (C of V)         |
| 5    | Max Temperature of Warmest Period        |
| 6    | Min Temperature of Coldest Period        |
| 7    | Temperature Annual Range (5-6)           |
| 8    | Mean Temperature of Wettest Quarter      |
| 9    | Mean Temperature of Driest Quarter       |
| 10   | Mean Temperature of Warmest Quarter      |
| 11   | Mean Temperature of Coldest Quarter      |
| 12   | Annual Precipitation                     |
| 13   | Precipitation of Wettest Period          |
| 14   | Precipitation of Driest Period           |
| 15   | Precipitation Seasonality(C of V)        |
| 16   | Precipitation of Wettest Quarter         |
| 17   | Precipitation of Driest Quarter          |
| 18   | Precipitation of Warmest Quarter         |
| 19   | Precipitation of Coldest Quarter         |
| 20   | Annual Mean Radiation                    |
| 21   | Highest Period Radiation                 |
| 22   | Lowest Period Radiation                  |
| 23   | Radiation Seasonality (Cof V)            |
| 24   | Radiation of Wettest Quarter             |
| 25   | Radiation of Driest Quarter              |
| 26   | Radiation of Warmest Quarter             |
| 27   | Radiation of Coldest Quarter             |
| 28   | Annual Mean Moisture Index               |
| 29   | Highest Period Moisture Index            |
| 30   | Lowest Period Moisture Index             |
| 31   | Moisture Index Seasonality (C of V)      |
| 32   | Mean Moisture Index of High Qtr.MI       |
| 33   | Mean Moisture Index of Low Qtr.MI        |
| 34   | Mean Moisture Index of Warm Qtr.MI       |
| 35   | Mean Moisture Index of Cold Qtr.MI       |

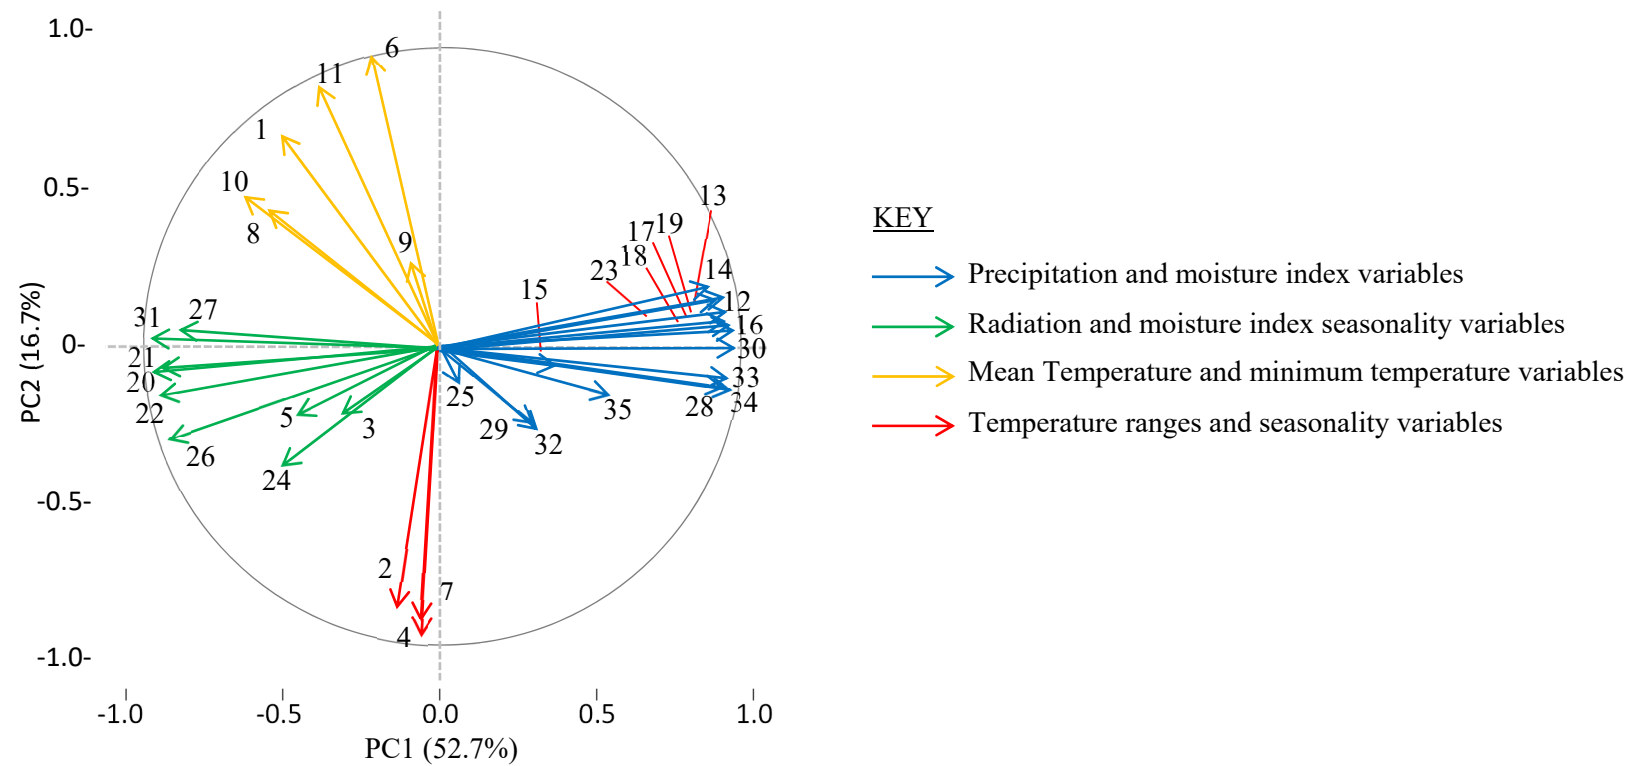

**Supplementary Figure S1.** Principal component map showing dimensions PC1 and PC2 for 35 Bioclim variables (see Table S2 for variable codes and names) at the 40 population locations.
